# Supplementary material for: Analysis of Pyrrolizidine Alkaloids in Stingless Bee Honey and Identification of a Botanical Source as Ageratum conyzoides
Source: MDPI journal article supplement (doi:10.3390/toxins16010040), 2024-01-12
Supplement: s1 [file s1]

# Supplementary material: Analysis of Pyrrolizidine Alkaloids in Stingless Bee Honey and Identification of a Botanical Source as *Ageratum conyzoides*

Natasha L. Hungerford <sup>1,\*</sup>, Norhasnida Zawawi <sup>1,2</sup>, Tianqi (Evonne) Zhu <sup>1</sup>, Steve J. Carter <sup>3</sup>, Kevin J. Melksham <sup>3</sup> and Mary T. Fletcher <sup>1</sup>

<sup>1</sup> Queensland Alliance for Agriculture and Food Innovation (QAAFI), The University of Queensland, Health and Food Sciences Precinct, Coopers Plains, QLD 4108, Australia; norhasnida@upm.edu.my or n.zawawi@uq.edu.au (N.Z.); mary.fletcher@uq.edu.au (M.T.F.)

<sup>2</sup> Faculty of Food Science and Technology, University Putra Malaysia, Serdang 43400, Malaysia

<sup>3</sup> Forensic and Scientific Services, Queensland Health, Coopers Plains, QLD 4108, Australia; steve.carter@health.qld.gov.au (S.J.C.); kevin.melksham@health.qld.gov.au (K.J.M.)

\* Correspondence: n.hungerford@uq.edu.au

**Table S1.** Pyrrolizidine alkaloids standards details used in the Orbitrap analysis of SBH and PA containing plants, including formulae, retention times, precursor ions used for quantitation and product ions used for confirmation.

| Compound                                                           | Formula (M)                                     | Typical R <sub>T</sub> (min) | Precursor Ion (MH <sup>+</sup> )<br><i>m/z</i> | Product Ions ( <i>m/z</i> ) |          |          |          |                   |
|--------------------------------------------------------------------|-------------------------------------------------|------------------------------|------------------------------------------------|-----------------------------|----------|----------|----------|-------------------|
| echimidine                                                         | C <sub>20</sub> H <sub>31</sub> NO <sub>7</sub> | 13.37                        | 398.2173                                       | 120.0809                    | 83.0497  | 55.0550  |          |                   |
| echimidine<br>N-oxide                                              | C <sub>20</sub> H <sub>31</sub> NO <sub>8</sub> | 13.39                        | 414.2122                                       | 396.2004                    | 352.1745 | 254.1379 | 220.1326 | 137.0833          |
| erucifoline                                                        | C <sub>18</sub> H <sub>23</sub> NO <sub>6</sub> | 6.57                         | 350.1598                                       | 322.1642                    | 220.1329 | 164.1066 | 138.0911 | 120.0807          |
| erucifoline<br>N-oxide                                             | C <sub>18</sub> H <sub>23</sub> NO <sub>7</sub> | 8.17                         | 366.1547                                       | 278.1386                    | 218.1172 | 164.1067 | 136.0756 | 119.0729          |
| europine                                                           | C <sub>16</sub> H <sub>27</sub> NO <sub>6</sub> | 7.29                         | 330.1911                                       | 254.1385                    | 156.1019 | 138.0914 | 120.0810 | 96.0812           |
| europine<br>N-oxide                                                | C <sub>16</sub> H <sub>27</sub> NO <sub>7</sub> | 8.12                         | 346.1860                                       | 328.1743                    | 270.1328 | 256.1172 | 172.0964 | 155.0937          |
| helioamplexine <sup>a</sup>                                        | C <sub>16</sub> H <sub>27</sub> NO <sub>5</sub> | 9.61                         | 314.1962                                       | 156.1017                    | 138.0913 | 120.0808 | 94.0655  |                   |
| helioamplexine<br>N-oxide <sup>a</sup>                             | C <sub>16</sub> H <sub>27</sub> NO <sub>6</sub> | 10.67                        | 330.1911                                       | 172.0966                    | 155.0938 | 138.0913 | 111.0913 | 94.0653           |
| heliotrine                                                         | C <sub>16</sub> H <sub>27</sub> NO <sub>5</sub> | 9.97                         | 314.1962                                       | 156.1017                    | 138.0913 | 120.0808 | 94.0655  |                   |
| heliotrine<br>N-oxide                                              | C <sub>16</sub> H <sub>27</sub> NO <sub>6</sub> | 11.02                        | 330.1911                                       | 172.0966                    | 155.0938 | 138.0913 | 111.0913 | 94.0653           |
| indicine                                                           | C <sub>15</sub> H <sub>25</sub> NO <sub>5</sub> | 7.09                         | 300.1806                                       | 156.1019                    | 138.0914 | 120.0810 | 94.0656  | 82.0657           |
| indicine N-oxide<br>and intermedine<br>N-oxide (n.r.) <sup>b</sup> | C <sub>15</sub> H <sub>25</sub> NO <sub>6</sub> | 8.66                         | 316.1755                                       | 226.1437                    | 172.0968 | 155.0941 | 138.0914 | 111.0682 94.0656  |
| intermedine                                                        | C <sub>15</sub> H <sub>25</sub> NO <sub>5</sub> | 6.73                         | 300.1806                                       | 210.1488                    | 156.1019 | 138.0914 | 120.0810 | 94.0656           |
| jacobine                                                           | C <sub>18</sub> H <sub>25</sub> NO <sub>6</sub> | 6.98                         | 352.1755                                       | 308.1485                    | 280.1539 | 262.1432 | 234.1483 | 155.1063          |
| jacobine<br>N-oxide                                                | C <sub>18</sub> H <sub>25</sub> NO <sub>7</sub> | 8.2                          | 368.1704                                       | 296.1485                    | 190.1222 | 139.0989 | 121.0885 | 120.0807          |
| lasiocarpine                                                       | C <sub>21</sub> H <sub>33</sub> NO <sub>7</sub> | 15.53                        | 412.2330                                       | 238.1435                    | 156.1020 | 138.0914 | 120.0810 | 94.0656           |
| lasiocarpine<br>N-oxide                                            | C <sub>21</sub> H <sub>33</sub> NO <sub>8</sub> | 16.75                        | 428.2279                                       | 410.2168                    | 352.1746 | 328.1753 | 254.1384 | 220.1333 137.0835 |
| lycopsamine                                                        | C <sub>15</sub> H <sub>25</sub> NO <sub>5</sub> | 7.25                         | 300.1806                                       | 156.1017                    | 138.0914 | 120.0808 | 94.0655  |                   |

| Compound                  | Formula (M)                                     | Typical R <sub>T</sub> (min) | Precursor Ion (MH <sup>+</sup> )<br><i>m/z</i> |          | Product Ions ( <i>m/z</i> ) |          |          |          |
|---------------------------|-------------------------------------------------|------------------------------|------------------------------------------------|----------|-----------------------------|----------|----------|----------|
| lycopsamine<br>N-oxide    | C <sub>15</sub> H <sub>25</sub> NO <sub>6</sub> | 9.16                         | 316.1755                                       | 172.0964 | 155.0937                    | 138.0911 | 136.0755 | 94.0654  |
| monocrotaline             | C <sub>16</sub> H <sub>23</sub> NO <sub>6</sub> | 3.35                         | 326.1598                                       | 280.1548 | 237.1354                    |          |          |          |
| monocrotaline<br>N-oxide  | C <sub>16</sub> H <sub>23</sub> NO <sub>7</sub> | 7.87                         | 342.1547                                       | 314.1590 | 296.1487                    | 236.1274 | 137.0833 | 119.0729 |
| retrorsine                | C <sub>18</sub> H <sub>25</sub> NO <sub>6</sub> | 9.64                         | 352.1755                                       | 324.1802 | 138.0913                    | 120.0808 | 94.0655  |          |
| retrorsine<br>N-oxide     | C <sub>18</sub> H <sub>25</sub> NO <sub>7</sub> | 10.15                        | 368.1704                                       | 220.1340 | 154.0862                    |          |          |          |
| senecionine               | C <sub>18</sub> H <sub>25</sub> NO <sub>5</sub> | 11.74                        | 336.1806                                       | 308.1864 | 120.0809                    |          |          |          |
| senecionine<br>N-oxide    | C <sub>18</sub> H <sub>25</sub> NO <sub>6</sub> | 12.41                        | 352.1755                                       | 324.1825 | 220.1332                    |          |          |          |
| seneciphylline            | C <sub>18</sub> H <sub>23</sub> NO <sub>5</sub> | 10.08                        | 334.1649                                       | 306.1706 | 120.0811                    |          |          |          |
| seneciphylline<br>N-oxide | C <sub>18</sub> H <sub>23</sub> NO <sub>6</sub> | 10.97                        | 350.1598                                       | 322.1656 | 246.1495                    |          |          |          |
| senecivernine             | C <sub>18</sub> H <sub>25</sub> NO <sub>5</sub> | 11.43                        | 336.1806                                       | 308.1848 | 153.0907                    | 138.0911 | 120.0807 | 94.0654  |
| senecivernine<br>N-oxide  | C <sub>18</sub> H <sub>25</sub> NO <sub>6</sub> | 11.98                        | 352.1755                                       | 324.1795 | 220.1327                    | 154.0859 | 136.0755 | 120.0807 |
| senkirkine                | C <sub>19</sub> H <sub>27</sub> NO <sub>6</sub> | 14.47                        | 366.1911                                       | 168.1020 | 150.0915                    |          |          |          |
| trichodesmine             | C <sub>18</sub> H <sub>27</sub> NO <sub>6</sub> | 9.34                         | 354.1911                                       | 308.1857 | 223.1203                    | 222.1489 | 164.1071 | 121.0889 |

<sup>a</sup> Standard isolated from *Heliotropium amplexicaule* and confirmed by NMR to be >95% [19]. <sup>b</sup>n.r. = not resolved.
